# Supplementary material for: Analysis of lncRNAs and mRNA Expression in the ZBTB1 Knockout Monoclonal EL4 Cell Line and Combined Analysis With miRNAs and circRNAs
Source: Front Cell Infect Microbiol. 2021 Dec 9;11:806290. doi: 10.3389/fcimb.2021.806290 (PMC8695857; doi:10.3389/fcimb.2021.806290)
Supplement: Supplementary Table 3 — Statistics for the significant differential expression of lncRNA genes that are upregulated and downregulated. [file Table_3.xls]

gene_id	length	EL-4WT-1.rawreads	EL-4WT-1.FPKM	EL-4WT-2.rawreads	EL-4WT-2.FPKM	EL-4WT-3.rawreads	EL-4WT-3.FPKM	Zbtb1ko-1.rawreads	Zbtb1ko-1.FPKM	Zbtb1ko-2.rawreads	Zbtb1ko-2.FPKM	Zbtb1ko-3.rawreads	Zbtb1ko-3.FPKM	baseMean	log2FoldChange	lfcSE	stat	pvalue	padj	Regulation
TCONS_00030434	7467	219.00	18.17	171.00	13.69	176.00	13.54	8.00	0.38	11.00	0.82	19.00	1.37	99.2820356486425	-3.62516322676735	0.347578079608264	-10.4297809311021	1.81305814831395e-25	4.12289422926593e-22	Down
TCONS_00162786	11355	411.49	22.20	498.76	25.97	285.34	14.28	58.54	1.82	56.99	2.76	67.00	3.14	225.625041556368	-2.58890143063222	0.282236080382695	-9.17282236602006	4.60793380212251e-20	3.60697000057733e-17	Down
TCONS_00093206	5278	75.00	8.92	71.94	8.26	60.90	6.72	0.00	0.00	0.00	0.00	0.00	0.00	34.1743006461032	-5.25674682039267	0.573295099169343	-9.16935593555441	4.75853562081442e-20	3.60697000057733e-17	Down
TCONS_00000655	10566	231.56	13.44	264.07	14.80	168.01	9.05	22.85	0.76	31.08	1.62	33.00	1.66	123.070432951485	-2.77881440930155	0.304585536530475	-9.123264489033	7.28947956277304e-20	4.14406913143648e-17	Down
TCONS_00229096	6461	1161.60	111.93	1333.65	124.05	1312.01	117.27	469.20	25.93	449.69	38.88	457.77	38.26	850.52755269824	-1.44516395084384	0.191123883712744	-7.56139904009012	3.9875686314696e-14	1.81354621359237e-11	Down
TCONS_00131486	2069	125.00	40.93	132.00	41.76	138.00	41.92	33.00	6.08	30.00	8.81	35.00	9.93	80.9018781032039	-1.93623595807349	0.271024640394037	-7.14413256026624	9.05659706341483e-13	3.43245028703422e-10	Down
TCONS_00088297	5661	234.00	25.87	313.06	33.42	274.98	28.20	92.27	5.84	70.00	6.94	69.93	6.71	172.81999353834	-1.76186104996512	0.255643723693582	-6.89186115938803	5.50671070346956e-12	1.78889430566997e-09	Down
TCONS_00034246	2746	75.12	17.96	71.41	16.49	59.68	13.23	10.98	1.49	10.36	2.22	10.04	2.08	38.9145016554763	-2.51139577118451	0.368617697782015	-6.8130092133277	9.55780175192635e-12	2.71680514798507e-09	Down
TCONS_00027308	8176	278.00	21.00	228.00	16.62	221.00	15.49	65.00	2.82	76.00	5.15	79.00	5.18	155.499665859036	-1.67492744384233	0.247077707656795	-6.77895007091817	1.21052349333931e-11	3.05858935983733e-09	Down
TCONS_00019504	2160	45.00	14.04	24.57	7.40	28.96	8.38	1.00	0.18	0.00	0.00	1.00	0.27	16.6421434860413	-3.78553251390828	0.581814076960383	-6.50642991260255	7.69577825763999e-11	1.75001997578733e-08	Down
TCONS_00052335	2649	27.00	6.71	23.00	5.52	26.00	6.00	0.00	0.00	0.00	0.00	0.00	0.00	12.5073536036985	-4.01353699673791	0.619112100332114	-6.48273066313015	9.00772184963331e-11	1.86214177146056e-08	Down
TCONS_00134140	288	162.03	1478.64	189.04	1659.62	144.00	1184.63	477.05	1623.75	380.05	3084.55	503.01	3782.50	302.488507950447	1.4048475687266	0.222934953539192	6.30160298519374	2.94582945392866e-10	5.58234681519481e-08	Ups
TCONS_00004618	5171	34.00	4.13	41.00	4.81	52.00	5.86	0.00	0.00	5.00	0.55	3.00	0.32	22.203241972004	-3.19704270110044	0.51713634636064	-6.18220460348553	6.32125217875238e-10	1.10573288111407e-07	Down
TCONS_00100023	9228	656.87	43.81	738.35	47.54	548.75	33.95	249.99	9.59	251.64	15.06	282.73	16.36	446.990381186552	-1.28348609172107	0.213052151737283	-6.02428129101346	1.69862724759452e-09	2.75905597216425e-07	Down
TCONS_00080065	13939	183.45	8.03	232.10	9.80	163.31	6.63	20.14	0.51	50.23	1.97	50.30	1.91	114.335670406284	-2.10290180462433	0.355392902095791	-5.91711818728874	3.27631274769685e-09	4.96689012550842e-07	Down
TCONS_00056085	8103	234.78	17.90	266.97	19.65	253.07	17.90	109.26	4.78	74.21	5.08	101.03	6.68	170.227272046385	-1.37634185842692	0.240010021674703	-5.73451828729193	9.77898739630256e-09	1.3898385836995e-06	Down
TCONS_00000812	3073	27.66	5.85	21.05	4.30	22.00	4.32	0.00	0.00	0.00	0.00	2.35	0.43	11.996428853803	-3.39755568925066	0.594825586895875	-5.71185195139464	1.1175329079071e-08	1.46980965465514e-06	Down
TCONS_00216025	7729	88.00	7.04	113.00	8.73	100.00	7.43	33.00	1.52	27.00	1.94	23.00	1.60	63.0066805675771	-1.75864783302399	0.308501831718731	-5.70060742662752	1.1938127224107e-08	1.46980965465514e-06	Down
TCONS_00018906	635	13.00	19.61	14.00	20.49	12.00	16.80	73.00	56.53	54.00	73.15	60.00	77.98	36.9338533253482	2.07058650551157	0.363529767076617	5.69578255492673	1.22807315032751e-08	1.46980965465514e-06	Ups
TCONS_00103263	2891	247.00	55.82	220.00	48.02	276.00	57.86	85.00	10.90	91.00	18.45	108.00	21.16	168.554624254314	-1.3564300844991	0.23887919246995	-5.67830990415679	1.3603209567999e-08	1.54668492788149e-06	Down
TCONS_00176891	243	74.82	1285.07	70.26	1126.12	93.98	1383.74	428.70	2479.96	216.78	3212.79	254.01	3438.11	186.370877037505	1.78112108170528	0.327481137157181	5.43885091265699	5.36253039502719e-08	5.80685434204373e-06	Ups
TCONS_00146280	3888	61.51	10.10	79.01	12.53	79.08	12.05	19.00	1.78	22.00	3.24	17.04	2.43	45.6468858301999	-1.7984566468706	0.33561582780598	-5.35867649218942	8.38338152254701e-08	8.40340395593224e-06	Down
TCONS_00129271	2809	14.00	3.26	18.00	4.05	16.00	3.46	0.00	0.00	0.00	0.00	0.00	0.00	7.87792009485778	-3.43454543675771	0.641229130132632	-5.35619059609364	8.49948509175205e-08	8.40340395593224e-06	Down
TCONS_00136880	1430	29.00	14.58	26.00	12.64	25.00	11.66	0.00	0.00	3.00	1.35	3.00	1.31	14.1308376146995	-2.89151724760807	0.542524136323784	-5.32974858446183	9.83488199179559e-08	9.31855068722632e-06	Down
TCONS_00003204	3419	26.00	4.90	16.00	2.91	15.00	2.62	1.00	0.11	0.00	0.00	0.00	0.00	9.55278410648665	-3.31265768647651	0.622954710528139	-5.31765412555923	1.0511363677586e-07	9.56113640113226e-06	Down
TCONS_00147712	207	12.72	443.30	30.29	943.45	19.25	535.46	122.57	1341.58	82.45	2376.26	79.85	2072.77	56.7778449498816	2.00708002741504	0.378140831725387	5.30775800713481	1.10981848981432e-07	9.70664325322218e-06	Ups
TCONS_00022097	3635	42.00	7.41	33.01	5.63	19.00	3.11	2.00	0.20	4.00	0.63	0.00	0.00	16.454185599985	-2.96149046898308	0.561583167708665	-5.27346729615554	1.33870118595283e-07	1.12748388772471e-05	Down
TCONS_00032345	1356	31.00	16.62	21.00	10.89	20.05	9.98	0.00	0.00	3.00	1.44	1.00	0.46	12.5210581664696	-2.99714463722387	0.576224030658572	-5.20135308102026	1.97842835665145e-07	1.60676645822336e-05	Down
TCONS_00232184	5031	243.12	30.41	263.68	31.85	196.69	22.83	61.71	4.42	87.17	9.78	107.72	11.69	157.315571066773	-1.40169222928185	0.276975114699984	-5.06071540325976	4.17686281490454e-07	3.25227050932674e-05	Down
TCONS_00055976	1044	22.00	16.36	35.00	25.18	38.00	26.22	146.00	59.08	102.00	68.07	95.00	61.09	71.7658408120027	1.71989239337919	0.340196094028987	5.05559124154036	4.29059433948119e-07	3.25227050932674e-05	Ups
TCONS_00103171	663	0.00	0.00	0.00	0.00	0.00	0.00	22.31	16.26	15.77	19.96	9.01	10.94	7.75042724100975	3.27775847807003	0.649687902574548	5.04512776839634	4.53218407209544e-07	3.26804256719782e-05	Ups
TCONS_00035920	7836	31.93	2.52	31.00	2.36	28.06	2.05	69.34	3.14	153.80	10.89	154.82	10.60	76.5972866631073	1.87218733187256	0.371293648994858	5.04233599723784	4.59882859060379e-07	3.26804256719782e-05	Ups
TCONS_00071663	8609	34.77	2.49	53.72	3.71	42.24	2.81	162.21	6.68	115.94	7.45	118.19	7.34	86.2231358567375	1.5050601192282	0.303716853486066	4.95547119612592	7.21552117042462e-07	4.9721500428926e-05	Ups
TCONS_00031988	4713	86.86	11.64	103.63	13.41	72.48	9.01	168.07	12.87	388.28	46.68	398.71	46.33	198.786034852945	1.71096483288211	0.355356776551768	4.81478037223488	1.47361872062122e-06	9.85590873733132e-05	Ups
TCONS_00020108	10012	654.00	40.12	660.00	39.08	673.00	38.30	48.00	1.69	168.00	9.25	211.00	11.23	395.867813593199	-1.99469546836117	0.417701331339791	-4.77541084670025	1.79340731390379e-06	0.000115544027123624	Down
TCONS_00212543	1868	33.88	12.46	33.14	11.78	28.67	9.78	4.02	0.83	7.00	2.31	6.05	1.93	18.5569245682826	-2.1657453779929	0.453898255670605	-4.77143357775886	1.82919304153494e-06	0.000115544027123624	Down
TCONS_00136590	6903	943.06	84.85	969.30	84.18	1106.81	92.37	1735.05	89.56	2474.89	199.76	2481.14	193.64	1588.78632398082	1.10238593510902	0.232435563330285	4.74275932354878	2.10826688437101e-06	0.00012628840879262	Ups
TCONS_00009612	492	29.41	69.21	20.50	46.92	16.33	35.67	148.95	169.45	73.72	155.84	69.67	140.65	58.7098839719871	1.94053051698256	0.409173779818665	4.74255832776614	2.11036039319242e-06	0.00012628840879262	Ups
TCONS_00069602	2394	0.00	0.00	0.31	0.08	0.00	0.00	15.50	2.44	9.34	2.33	11.86	2.86	6.02882579392402	3.05639294452389	0.654992970140361	4.66629885183185	3.06673570890108e-06	0.000178814282103617	Ups
TCONS_00143174	3127	19.00	3.94	22.00	4.41	21.00	4.04	2.00	0.24	2.00	0.37	3.00	0.54	11.3183240000406	-2.47316402449978	0.537790975299238	-4.59874586613073	4.25041888194364e-06	0.000241636313438496	Down
TCONS_00152311	6872	155.85	14.09	173.32	15.12	147.51	12.37	60.90	3.16	63.70	5.17	86.91	6.81	112.755933494914	-1.14112342767832	0.251413354868709	-4.5388337794316	5.65662025295598e-06	0.000313735474517607	Down
TCONS_00122783	3393	32.00	6.08	34.00	6.24	37.00	6.52	65.00	7.03	146.00	24.89	160.00	26.36	77.3222739619997	1.67772779430889	0.375150141087735	4.47215024215205	7.74369891115181e-06	0.000411312721737623	Ups
TCONS_00182175	2397	56.00	15.55	60.00	16.09	46.00	11.85	242.00	37.96	117.00	29.15	144.00	34.66	108.714738086301	1.51508127023591	0.339005288123496	4.46919656806055	7.85139525217583e-06	0.000411312721737623	Ups
TCONS_00056007	2011	33.00	11.16	41.00	13.39	31.00	9.72	1.00	0.19	7.00	2.12	9.00	2.64	19.9746947097876	-2.20263662581266	0.493168557062619	-4.46629574061225	7.95855750064001e-06	0.000411312721737623	Down
TCONS_00111470	766	6.37	7.23	4.73	5.20	5.37	5.66	22.30	13.36	28.66	29.20	34.29	33.58	16.4676181034922	2.04375255521847	0.469331705006155	4.3546015183263	1.33309191271736e-05	0.000673655779893174	Ups
TCONS_00064062	7572	155.01	12.67	148.15	11.69	136.00	10.31	55.00	2.58	73.00	5.35	71.00	5.04	104.663265859543	-1.10700627078917	0.256746216776332	-4.31167510348769	1.62022389632728e-05	0.00080095416092353	Down
TCONS_00111603	18105	820.00	27.52	817.00	26.46	871.00	27.12	1302.00	25.19	2689.00	80.97	2665.00	77.61	1498.3407425484	1.31926754711966	0.307865796375954	4.28520336669233	1.82572101701853e-05	0.00087421003242664	Ups
TCONS_00118019	794	0.00	0.00	0.00	0.00	0.00	0.00	7.48	4.28	9.08	8.78	16.10	14.98	5.16401739351379	2.82989681643078	0.662140299406111	4.27386283385708	1.92115248700575e-05	0.000891571582745119	Ups
TCONS_00217210	5098	188.00	23.20	223.00	26.56	194.00	22.20	1103.00	77.86	393.00	43.50	528.00	56.50	429.814120165528	1.58833563478986	0.373037322391141	4.2578464390875	2.0640564618907e-05	0.000938732878867889	Ups
TCONS_00038632	7844	101.00	7.96	92.28	7.02	75.00	5.48	14.04	0.64	24.10	1.70	42.40	2.90	56.9356620211668	-1.61008975101746	0.381605404553371	-4.21925300796488	2.45113084939857e-05	0.00109291599049654	Down
TCONS_00177956	2167	20.00	6.22	35.00	10.51	22.00	6.34	92.00	16.11	82.00	22.87	62.00	16.70	51.3545458348754	1.49475726642161	0.355446481890657	4.20529486878262	2.60741986439787e-05	0.00114024476377707	Ups
TCONS_00026497	3769	132.00	22.41	159.03	26.07	130.59	20.57	49.00	4.74	68.00	10.36	72.00	10.60	100.077197936767	-1.11922042643065	0.269096392722587	-4.15918034094371	3.19391659110293e-05	0.00134499376447557	Down
TCONS_00054880	6230	224.00	22.42	182.00	17.58	189.00	17.54	79.00	4.53	105.00	9.43	97.00	8.42	143.859492112052	-1.05128320968426	0.253949337690762	-4.13973597743509	3.47705767719585e-05	0.00143760530144425	Down
TCONS_00168340	202	8.55	334.82	5.35	186.19	7.84	242.40	28.63	349.69	34.12	1098.80	31.25	904.34	19.0107809880455	1.82175948848064	0.442302791352123	4.11880622076002	3.80840232294672e-05	0.00154648337185372	Ups
TCONS_00163142	4334	8.07	1.18	4.12	0.58	8.16	1.11	24.89	2.08	28.59	3.76	38.40	4.88	18.2519676218999	1.88170404211118	0.458802394957931	4.10133875234831	4.10766701090442e-05	0.00163874294435029	Ups
TCONS_00167480	1303	28.00	15.76	37.00	20.14	33.00	17.23	3.00	0.93	11.00	5.56	2.00	0.97	18.7661973979991	-2.11557372375904	0.516644833882905	-4.09483185549189	4.22474883783361e-05	0.00165639290641959	Down
TCONS_00190308	3843	11.62	1.93	10.28	1.65	10.41	1.61	0.00	0.00	1.27	0.19	0.00	0.00	5.43519895911933	-2.62733657541975	0.647518624122245	-4.05754595704684	4.95910608541626e-05	0.00191135715902315	Down
TCONS_00176027	3078	85.00	17.95	75.00	15.29	89.00	17.43	34.00	4.08	26.00	4.92	42.00	7.69	57.5163559400408	-1.23440811631537	0.30526036418339	-4.04378773384997	5.25945395867225e-05	0.00197159997046441	Down
TCONS_00022096	2123	33.08	10.52	24.13	7.42	15.00	4.43	4.99	0.89	2.97	0.85	4.02	1.11	13.7896659202054	-2.10048167641061	0.519689039574	-4.04180484185777	5.30413691303686e-05	0.00197159997046441	Down
TCONS_00238402	3639	105.83	18.66	116.72	19.87	66.66	10.90	15.43	1.55	42.03	6.65	23.80	3.64	60.9026588567328	-1.64599250640582	0.407558066309302	-4.03866992821742	5.37551443134535e-05	0.00197159997046441	Down
TCONS_00238400	3006	147.91	32.04	158.11	33.07	94.58	19.00	21.97	2.70	46.27	8.99	61.26	11.50	86.6779195571979	-1.50865204476416	0.377365325447138	-3.99785550772734	6.39189479068069e-05	0.00227112011781373	Down
TCONS_00088771	1322	209.07	115.61	230.40	123.19	286.07	146.77	596.88	182.35	429.91	213.34	476.18	227.91	364.66580014498	1.00336517306781	0.251756867018013	3.98545304822219	6.73514947210605e-05	0.00235626613839526	Ups
TCONS_00017375	2108	0.00	0.00	0.00	0.00	1.00	0.30	6.00	1.08	11.00	3.16	17.05	4.74	5.66211449927094	2.5823114347747	0.652802226079607	3.95573319393031	7.63002791977449e-05	0.00262889143781321	Ups
TCONS_00158294	1988	17.00	5.82	19.00	6.29	9.00	2.86	41.00	7.89	51.00	15.68	54.00	16.03	31.189069139748	1.53299908089999	0.388633894692948	3.94458409787232	7.9938596594356e-05	0.00271313983068008	Ups
TCONS_00003205	1568	23.78	10.72	18.33	7.99	12.64	5.29	2.00	0.50	4.16	1.68	0.00	0.00	10.0560165048274	-2.30373706176678	0.585741539448556	-3.93302661091037	8.38829472609271e-05	0.00276449017494707	Down
TCONS_00197632	1548	120.00	54.91	143.00	63.25	114.00	48.40	12.00	3.06	47.00	19.30	47.00	18.62	79.1373581157249	-1.63932185692244	0.418469361578541	-3.91742384851934	8.95003054814557e-05	0.00290748135235472	Down
TCONS_00167494	865	10.24	9.79	14.00	12.96	7.00	6.21	0.00	0.00	0.00	0.00	1.00	0.83	5.22752276816081	-2.54985787367344	0.6524886850148	-3.90789592560614	9.31033929039369e-05	0.00298193120371201	Down
TCONS_00167948	2394	8.00	2.22	4.00	1.07	8.00	2.06	30.00	4.71	40.00	9.98	22.00	5.30	18.483869639913	1.86357949845435	0.479092275214325	3.88981328830791	0.000100321379028125	0.00316848355430494	Ups
TCONS_00061128	3387	138.00	26.28	148.00	27.21	93.00	16.43	5.00	0.54	24.00	4.10	49.00	8.09	74.6624714496455	-1.92696364763597	0.498404078049321	-3.86626781862985	0.000110513575335346	0.00344257356592572	Down
TCONS_00098220	9901	224.76	13.95	183.18	10.97	154.95	8.92	82.51	2.94	77.80	4.33	110.50	5.95	136.578624418512	-1.027390241788	0.267285373020896	-3.84379522970632	0.000121146101895172	0.0036741824475512	Down
TCONS_00003586	3138	37.00	7.65	57.00	11.38	52.00	9.97	1.00	0.12	16.00	2.97	9.00	1.61	28.2386791787236	-2.01177233046971	0.523391152984172	-3.84372628195828	0.000121180159879657	0.0036741824475512	Down
TCONS_00046503	265	70.98	870.06	62.10	723.51	77.19	835.89	217.47	943.72	128.26	1382.47	146.36	1450.97	114.76239348864	1.14968380653548	0.301464475347011	3.81366263873083	0.000136922346803276	0.00409686074514014	Ups
TCONS_00022409	741	21.00	25.01	21.00	24.24	13.00	14.37	5.00	3.13	1.00	1.07	0.00	0.00	10.0189731348039	-2.26377339719101	0.595667008915319	-3.80040083353489	0.000144462221773783	0.00426632587420237	Down
TCONS_00065886	2300	62.00	18.03	80.00	22.47	85.00	22.93	23.00	3.77	34.00	8.87	35.00	8.82	52.2975227003111	-1.23104525912412	0.324789519198919	-3.79028628189864	0.000150473755113554	0.00438688870677206	Down
TCONS_00004358	3088	54.00	11.36	58.00	11.78	44.12	8.61	9.01	1.08	21.91	4.13	19.00	3.47	33.7852372222222	-1.48969229919432	0.395027080488268	-3.77111436854658	0.00016252016156388	0.00467811199235776	Down
TCONS_00035457	3063	36.00	7.64	29.00	5.94	19.00	3.74	0.00	0.00	5.00	0.95	8.00	1.47	15.89217949303	-2.0941881975524	0.556046360606931	-3.76621149946304	0.000165743403147071	0.0047112562344555	Down
TCONS_00145874	1786	30.00	11.62	26.57	9.94	38.08	13.68	83.18	18.04	59.59	20.71	92.46	31.02	53.792206953982	1.20939980112032	0.321450189480375	3.76232411956364	0.000168341687936106	0.00472603701687291	Ups
TCONS_00047481	2096	4.53	1.46	7.92	2.47	11.02	3.30	0.00	0.00	0.00	0.00	0.00	0.00	3.94527243312818	-2.51080755632219	0.668967582187373	-3.75325744203092	0.000174551427610302	0.00484060910226617	Down
TCONS_00045707	1453	134.00	66.11	107.00	51.03	125.00	57.22	318.00	87.10	226.00	100.06	220.00	93.97	185.275856093045	1.00885565954586	0.269364238559964	3.74532144630354	0.000180162946073578	0.00493603059483515	Ups
TCONS_00227025	2389	5.00	1.39	5.00	1.35	7.00	1.81	31.00	4.88	25.00	6.25	19.00	4.59	15.1155293154987	1.80343347323335	0.482560952385709	3.73721384690876	0.000186070663534574	0.00503719867711454	Ups
TCONS_00207384	2170	105.00	32.58	97.00	29.08	68.00	19.58	21.00	3.67	37.00	10.30	44.00	11.83	60.921884355524	-1.31235141545312	0.352152664900207	-3.72665478997587	0.000194037926926468	0.00515437120751431	Down
TCONS_00021445	2238	16.00	4.80	21.00	6.08	17.00	4.73	4.00	0.68	0.00	0.00	4.00	1.04	10.1350941478228	-2.10274927394135	0.564421431535685	-3.72549509365752	0.000194932244435458	0.00515437120751431	Down
TCONS_00099830	24097	1757.72	44.18	1676.99	40.68	1342.25	31.29	39.05	0.57	376.00	8.48	473.02	10.32	928.495393029944	-1.96655759339562	0.532669295517407	-3.69189215512301	0.000222591854016116	0.00573905041072138	Down
TCONS_00051859	3704	47.90	8.29	48.42	8.09	53.55	8.59	17.70	1.74	20.35	3.16	20.63	3.09	34.2989131868354	-1.26230261458805	0.342125409018241	-3.68959037041517	0.000224615429443361	0.00573905041072138	Down
TCONS_00178004	7820	8.88	0.70	17.70	1.35	14.59	1.07	91.15	4.14	29.99	2.13	44.68	3.07	33.95406867302	1.69460601419357	0.467106700507603	3.62787776829586	0.000285760482285452	0.00722021485241242	Ups
TCONS_00034934	1687	6.08	2.51	7.00	2.80	6.00	2.30	184.00	42.53	21.00	7.80	7.00	2.51	38.1067878692897	2.25979577913403	0.633805374834029	3.56544117305063	0.000363244635105512	0.00884874821852035	Ups
TCONS_00157579	693	81.00	106.64	85.00	108.51	56.00	68.43	5.00	3.43	16.00	18.91	35.00	39.74	45.3905749171623	-1.71135530594712	0.480125872574928	-3.56438884821822	0.000364704956862251	0.00884874821852035	Down
TCONS_00021469	3265	41.00	8.12	26.00	4.97	33.00	6.06	7.00	0.79	12.00	2.13	11.00	1.89	21.3875615541777	-1.54151530189291	0.432570406255893	-3.5636171120338	0.00036577938985968	0.00884874821852035	Down
TCONS_00174883	2044	51.00	16.93	40.00	12.83	43.00	13.24	70.00	13.07	116.00	34.55	146.00	41.99	75.9770811252955	1.20276707932974	0.338491521050736	3.55331523695527	0.000380408313874273	0.00910577374473786	Ups
TCONS_00086899	3926	35.00	5.69	42.00	6.59	28.00	4.22	15.00	1.39	9.00	1.31	9.00	1.27	22.6169401409747	-1.48881622877142	0.420715901791354	-3.53876861424119	0.000401998052855784	0.00952232887702138	Down
TCONS_00182310	1110	6.00	4.12	16.00	10.64	6.00	3.83	0.00	0.00	0.00	0.00	1.00	0.59	4.71586353130035	-2.33393738418933	0.661836555303777	-3.52645583790408	0.000421161397439358	0.0098734125544031	Down
TCONS_00174884	1977	4.00	1.38	9.00	3.00	1.00	0.32	12.00	2.32	30.00	9.28	47.00	14.04	16.6418942885595	1.99695889605751	0.572919811003495	3.48558185230102	0.000491067960916038	0.0112422964687342	Ups
TCONS_00145128	1161	3.00	1.95	6.00	3.77	10.00	6.03	24.00	8.54	27.00	15.74	25.00	14.04	15.5579646291691	1.68198192030468	0.482803600833237	3.4837808114974	0.000494384189478195	0.0112422964687342	Ups
TCONS_00091286	3946	19.00	3.07	14.00	2.19	12.00	1.80	1.21	0.11	4.00	0.58	2.00	0.28	8.5607012047149	-1.99923369692086	0.574814595105485	-3.47804964234419	0.000505076376423702	0.0113717196038366	Down
TCONS_00064393	3844	103.00	17.13	81.00	13.00	74.00	11.41	8.00	0.76	28.00	4.18	41.00	5.91	54.8799489105147	-1.54524783454871	0.444829068081728	-3.4738013889524	0.000513140710160857	0.0114400193618215	Down
TCONS_00009024	796	16.00	17.18	29.00	30.17	18.00	17.94	0.00	0.00	7.00	6.75	2.00	1.85	11.8120492970388	-2.0262360008117	0.58967268542397	-3.43620461130034	0.00058992525883751	0.0130241751320048	Down
TCONS_00005635	3867	119.00	19.66	127.00	20.26	102.00	15.63	3.00	0.28	35.00	5.19	41.00	5.87	69.9480946527703	-1.75720223642758	0.51994218241706	-3.37961084107248	0.000725885310653126	0.0155722943058982	Down
TCONS_00106452	2300	81.01	23.56	51.29	14.41	83.16	22.43	384.26	63.05	115.92	30.24	165.22	41.63	144.062616191125	1.43152768580557	0.42570251203158	3.36274192739406	0.000771724720948659	0.0164009534153014	Ups
TCONS_00123149	2332	7.00	2.01	14.02	3.88	10.00	2.66	98.01	15.84	27.50	7.06	22.00	5.46	29.4055077628512	1.80239379335826	0.536400557097326	3.36016391017885	0.000778962428343646	0.0164014866856801	Ups
TCONS_00132458	1250	22.30	13.21	0.00	0.00	20.45	11.24	0.00	0.00	0.00	0.00	0.00	0.00	6.99067747049928	-2.24087439333031	0.671001804315205	-3.33959518278382	0.000839005937427783	0.0173445409246434	Down
TCONS_00169649	1162	0.00	0.00	3.00	1.88	0.00	0.00	18.45	6.56	11.00	6.40	7.00	3.93	6.40840517037297	2.13881612640977	0.645365725160876	3.31411483911175	0.00091933740725253	0.0186658327151094	Ups
TCONS_00028288	5780	0.00	0.00	0.00	0.00	0.00	0.00	0.00	0.00	19.32	1.88	21.99	2.06	6.64714597818273	2.21569310916014	0.67085342533059	3.30279763879608	0.000957254400437002	0.0190947061981907	Ups
TCONS_00149796	519	7.00	14.90	5.00	10.35	6.00	11.86	0.00	0.00	0.00	0.00	0.00	0.00	2.96502200489351	-2.21216844028513	0.671868407149437	-3.29256208023054	0.000992789772454513	0.0196313386309701	Down
TCONS_00232187	3366	93.74	17.97	88.16	16.32	98.90	17.59	18.38	2.00	54.56	9.38	30.63	5.09	63.383439221882	-1.29536370990239	0.395261422204599	-3.27723283157108	0.00104829886383699	0.0205502725548734	Down
TCONS_00069583	7739	23.25	1.86	39.00	3.01	26.00	1.93	1.00	0.05	7.00	0.50	12.00	0.83	17.6211678331782	-1.73299009897509	0.529605200385631	-3.27223013994806	0.00106702681282819	0.0207386236954812	Down
TCONS_00071199	605	17.00	27.74	13.00	20.59	11.00	16.66	4.00	3.32	1.00	1.47	2.00	2.81	7.88261141506553	-1.89211984588495	0.57977687469881	-3.26353107282503	0.00110033117580214	0.0212046872353735	Down
TCONS_00178006	3555	42.13	7.62	24.44	4.27	32.06	5.38	156.85	16.14	63.34	10.27	68.39	10.72	63.3066366392874	1.3735667702068	0.421349145350424	3.2599253739187	0.00111441531478761	0.0212956338304792	Ups
TCONS_00238393	1435	23.00	11.52	34.00	16.46	24.00	11.15	4.00	1.11	9.00	4.04	11.00	4.77	17.1686305480729	-1.51548734554213	0.465961704984769	-3.25238604230722	0.0011444047513022	0.0216864700371767	Down
TCONS_00220115	1486	8.00	3.84	4.00	1.86	6.00	2.67	0.00	0.00	0.00	0.00	0.00	0.00	2.9711945587917	-2.18274129243774	0.67196757536563	-3.24828365602324	0.001161034632385	0.0218197748268057	Down
TCONS_00005853	7093	63.00	5.51	61.00	5.15	52.00	4.22	25.00	1.25	29.00	2.28	29.00	2.20	42.4734628565608	-1.02844003701307	0.317878811157212	-3.23532113785475	0.00121505985836518	0.0226160132777345	Down
TCONS_00142925	1747	3.00	1.19	3.00	1.15	2.00	0.74	7.00	1.56	15.93	5.68	24.69	8.50	9.06417138798705	1.88507649507381	0.583002678037791	3.23339251445363	0.00122329359417825	0.0226160132777345	Ups
TCONS_00227418	2141	70.27	22.14	56.00	17.04	70.00	20.46	33.00	5.86	32.00	9.05	28.00	7.64	47.5100184399961	-1.02027956150583	0.317232722571418	-3.21618637962587	0.00129906434715261	0.0236325786034003	Down
TCONS_00232188	4626	404.17	55.23	568.04	74.94	332.54	42.15	117.57	9.18	187.84	23.03	280.57	33.25	308.687881828124	-1.08867246948076	0.340131458251688	-3.20074031104517	0.00137075012039557	0.0245439824707049	Down
TCONS_00182264	1555	1.14	0.52	0.00	0.00	0.00	0.00	7.76	1.97	5.00	2.04	8.77	3.46	3.72984817391599	2.12161822204581	0.664603364713456	3.19230737412915	0.00141141049418036	0.0246888266443549	Ups
TCONS_00034043	2986	816.00	178.04	843.00	177.63	786.00	159.09	152.00	18.83	382.00	74.78	481.00	90.98	566.400063139323	-1.17901845135242	0.37184661897435	-3.17071176982719	0.00152065946203917	0.0263108153111361	Down
TCONS_00204207	5328	132.69	15.63	148.95	16.94	101.00	11.04	24.00	1.62	77.14	8.15	38.66	3.95	85.9674367925686	-1.29429478181771	0.408600318642973	-3.16763037805812	0.00153686780689636	0.0263108153111361	Down
TCONS_00036173	3138	63.00	13.03	48.00	9.58	49.00	9.40	12.00	1.41	20.00	3.71	31.00	5.56	36.5194730185416	-1.23807829299311	0.390899327579479	-3.16725613384785	0.00153884715759943	0.0263108153111361	Down
TCONS_00001802	3096	4.00	0.84	6.00	1.22	7.00	1.36	38.00	4.53	15.00	2.82	17.00	3.09	14.2442864078966	1.64610876911468	0.52373096892103	3.14304264364189	0.00167201479439022	0.0283065260729566	Ups
TCONS_00132204	2962	21.00	4.62	27.00	5.74	19.00	3.88	10.00	1.25	4.00	0.79	1.00	0.19	13.4704314872755	-1.68990623529615	0.546879391239433	-3.09008944635157	0.00200096225612405	0.0332130523388766	Down
TCONS_00138091	1671	38.00	15.90	21.00	8.49	37.00	14.36	11.00	2.57	13.00	4.88	9.00	3.26	21.2738816572874	-1.35810582628623	0.440637136987748	-3.08214109135334	0.00205517400354525	0.0336380231660449	Down
TCONS_00093538	6054	68.00	7.01	85.00	8.46	77.00	7.36	36.00	2.13	45.00	4.16	24.00	2.15	55.0881330435338	-1.04997027376005	0.340678246766628	-3.08199975702971	0.00205615005280573	0.0336380231660449	Down
TCONS_00208073	1834	19.00	7.14	26.00	9.44	25.00	8.71	90.00	18.95	39.00	13.15	52.00	16.92	41.0202672216752	1.22743963465486	0.399551880248185	3.07204069191822	0.00212600740891907	0.0342134807268177	Ups
TCONS_00007458	800	8.00	8.53	9.00	9.30	4.00	3.96	0.00	0.00	1.00	0.96	0.00	0.00	3.61044428171505	-2.04788317895957	0.666937756075327	-3.07057616742315	0.00213646185717156	0.0342134807268177	Down
TCONS_00063067	288	1367.99	12483.74	1430.72	12560.72	1388.95	11426.06	7901.00	26892.78	2158.12	17515.67	1971.41	14824.32	2663.43423110392	1.3383794202123	0.436684078069159	3.06486883178813	0.00217765480100653	0.0346292798425794	Ups
TCONS_00192521	3606	61.00	10.86	79.00	13.58	73.00	12.06	257.00	26.06	126.00	20.13	110.00	16.98	115.842659041113	1.11042843071425	0.368022537519722	3.01728377342853	0.00255050926844172	0.0402767921974755	Ups
TCONS_00166722	2797	22.00	5.15	34.00	7.69	31.00	6.74	7.02	0.93	6.00	1.26	16.00	3.25	18.9215389395802	-1.38628638107536	0.461240574728663	-3.00556034535965	0.002650919886631	0.0414436268751731	Down
TCONS_00043713	2131	107.49	34.04	106.90	32.71	64.93	19.08	27.41	4.89	46.44	13.20	54.07	14.84	66.4299886281568	-1.06158674502849	0.353341271908531	-3.00442328543864	0.00266084851529255	0.0414436268751731	Down
TCONS_00028228	838	5.00	4.99	5.00	4.84	9.00	8.34	26.00	13.85	21.00	18.83	17.00	14.66	13.6318708577123	1.46666716419459	0.488900497437812	2.9999297850605	0.00270041849274934	0.0417106876404659	Ups
TCONS_00167151	3975	18.12	2.91	26.00	4.03	12.18	1.81	0.00	0.00	6.22	0.90	5.00	0.70	10.9579352301216	-1.74173290455311	0.581930809560839	-2.99302404330084	0.00276227987035439	0.0418761628345725	Down
TCONS_00145275	6819	0.00	0.00	0.00	0.00	0.00	0.00	11.34	0.59	0.00	0.00	19.68	1.56	4.90268370428357	1.99535794725275	0.667898638853758	2.98751611573452	0.00281254465980023	0.0423558050091769	Ups
TCONS_00175528	4177	74.03	11.27	45.91	6.75	40.04	5.65	8.99	0.78	21.38	2.92	28.23	3.73	35.7445042757372	-1.30434303877686	0.437694465752023	-2.98003091388375	0.0028821929510588	0.0431191234914981	Down
TCONS_00046780	1746	8.00	3.18	15.00	5.76	10.00	3.69	3.00	0.67	0.00	0.00	2.00	0.69	6.20313849323918	-1.84208188796637	0.618723171223726	-2.97723113282318	0.00290864639438668	0.0432304699401001	Down
TCONS_00136826	2077	10.00	3.26	13.00	4.09	17.00	5.14	0.00	0.00	2.00	0.59	5.00	1.41	7.69189860472144	-1.78915467212743	0.604194009287188	-2.96122544187127	0.00306417557792138	0.0444399771716227	Down
TCONS_00162117	3169	10.25	2.10	15.37	3.04	9.03	1.71	69.69	8.10	28.02	5.14	20.34	3.61	24.9761641481665	1.49152139188027	0.503762479819607	2.96076316047669	0.00306877825853368	0.0444399771716227	Ups
TCONS_00216318	1986	225.00	77.17	225.00	74.56	125.00	39.77	6.00	1.16	66.00	20.31	76.00	22.58	118.323547759404	-1.58175018184208	0.534579948727469	-2.95886552723746	0.00308773807964661	0.0444399771716227	Down
TCONS_00000502	2858	11.00	2.52	6.00	1.33	7.00	1.49	12.00	1.56	37.00	7.60	38.00	7.54	18.1308530217901	1.51179844768325	0.512626580214818	2.94912223835472	0.00318677901814988	0.0454908937630325	Ups
TCONS_00178320	12699	46.00	2.21	44.00	2.04	28.00	1.25	22.00	0.61	9.00	0.39	13.00	0.54	26.5394865574446	-1.26637870855356	0.429605888106024	-2.94776850973008	0.00320076649168215	0.0454908937630325	Down
TCONS_00151866	5140	938.00	114.74	935.00	110.41	561.00	63.66	187.00	13.09	388.00	42.58	506.00	53.68	574.646249908805	-1.08912706432378	0.370259535795916	-2.94152333438914	0.00326602234898771	0.0461300299478139	Down
TCONS_00212706	2714	32.00	7.75	37.00	8.65	36.00	8.09	4.00	0.55	15.00	3.26	17.00	3.57	23.0975288786479	-1.34646022792654	0.458920863764414	-2.93397039498675	0.0033465612697284	0.0465442496520906	Down
TCONS_00062764	503	4.00	9.03	5.00	10.97	11.00	23.04	0.00	0.00	0.00	0.00	1.00	1.94	3.45261462794572	-1.96378149405602	0.6695410179307	-2.93302641879259	0.00335675327306194	0.0465442496520906	Down
TCONS_00197535	2024	12.50	4.20	18.28	5.93	9.42	2.93	3.00	0.57	1.39	0.42	4.27	1.24	7.66307656850549	-1.70231165122841	0.581299557266426	-2.92845853733929	0.00340647262878678	0.0468033580682932	Down
TCONS_00176520	11271	7.20	0.39	6.93	0.36	2.38	0.12	0.00	0.00	0.00	0.00	0.00	0.00	2.61964544238652	-1.96265157904203	0.670410927039731	-2.92753518757268	0.00341660397508209	0.0468033580682932	Down
